# Supplementary material for: Asymmetric Evolution of Protein Domains in the Leucine-Rich Repeat Receptor-Like Kinase Family of Plant Signaling Proteins
Source: PubMed Central journal article supplement — Mol Biol Evol. 2023 Oct 3;40(10):msad220. doi: 10.1093/molbev/msad220 (PMC10588794; doi:10.1093/molbev/msad220), 2023-10-03
Supplement: msad220_supplementary_data.pdf [file msad220_supplementary_data.pdf]

**Supplemental Information: Asymmetric evolution of protein domains in the leucine-rich repeat receptor-like kinase (LRR-RLK) family of plant signaling proteins**

Jarrett Man, Thomas Harrington, Kyra Lally, Madelaine E. Bartlett.

**Supplemental Figures**

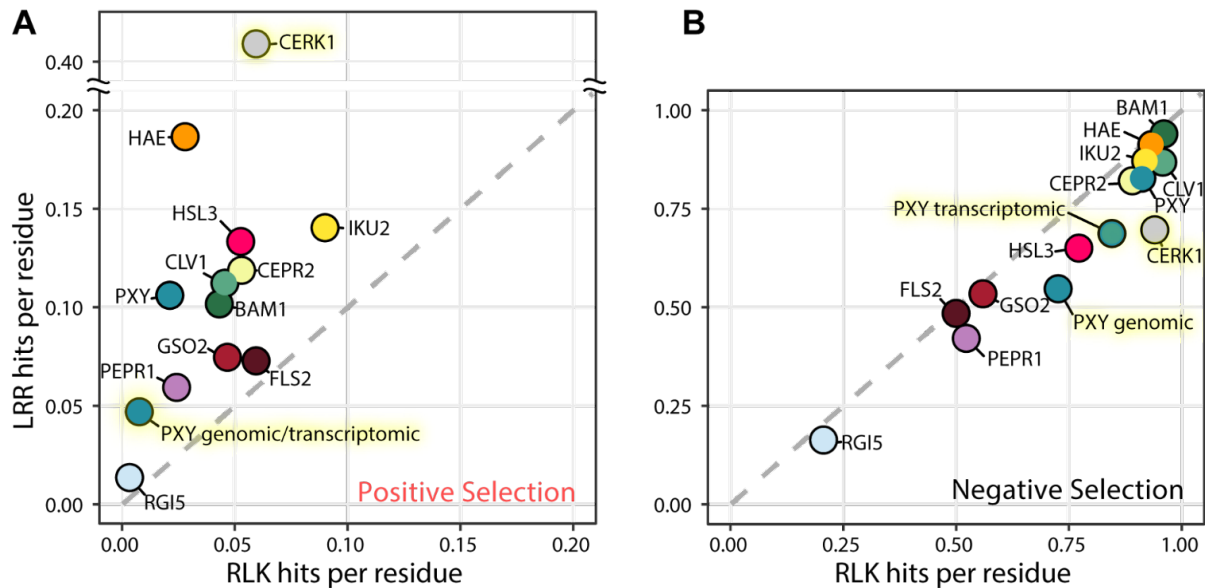

**FIG. S1. Transcriptome sequencing bias likely doesn't underlie higher positive selection acting on LRR domains.** (A) Positive selection detection rate for *CERK1*, *PXY* from genomic and *PXY* from transcriptomic datasets are also shown in addition to the other LRR-RLK clades. The two new *PXY* data points are identical. (B) Negative selection detection rate for *CERK1*, *PXY* from genomic and *PXY* from transcriptomic datasets are also shown in addition to the other LRR-RLK clades. Gray dashed line defines the region of no ratiometric bias between domains.

*Amborella trichopoda* BAM1 (Not in alignment)

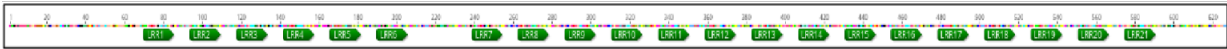

BAM1 clade alignment without *Amborella trichopoda* BAM1

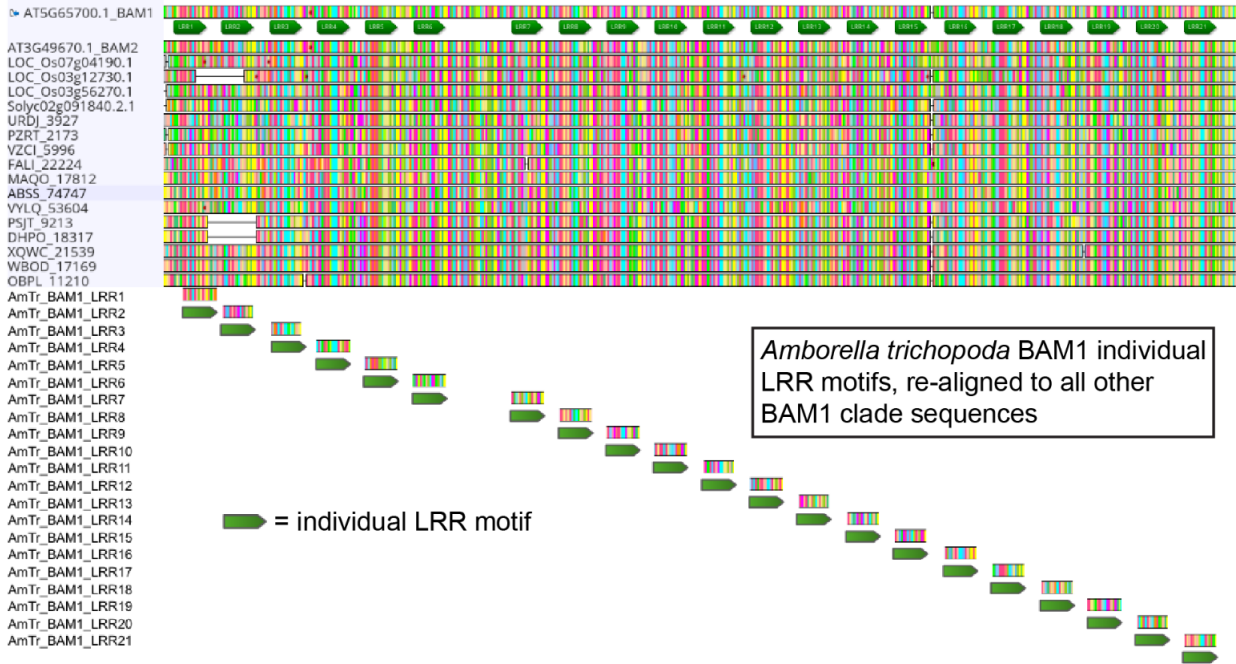

**FIG. S2. LRR motif misalignment is unlikely to explain higher positive selection in LRR domains.** Individual LRR motifs extracted from *Amborella trichopoda* BAM1 (top panel), aligned to all other BAM1 sequences, align correctly (bottom panel).

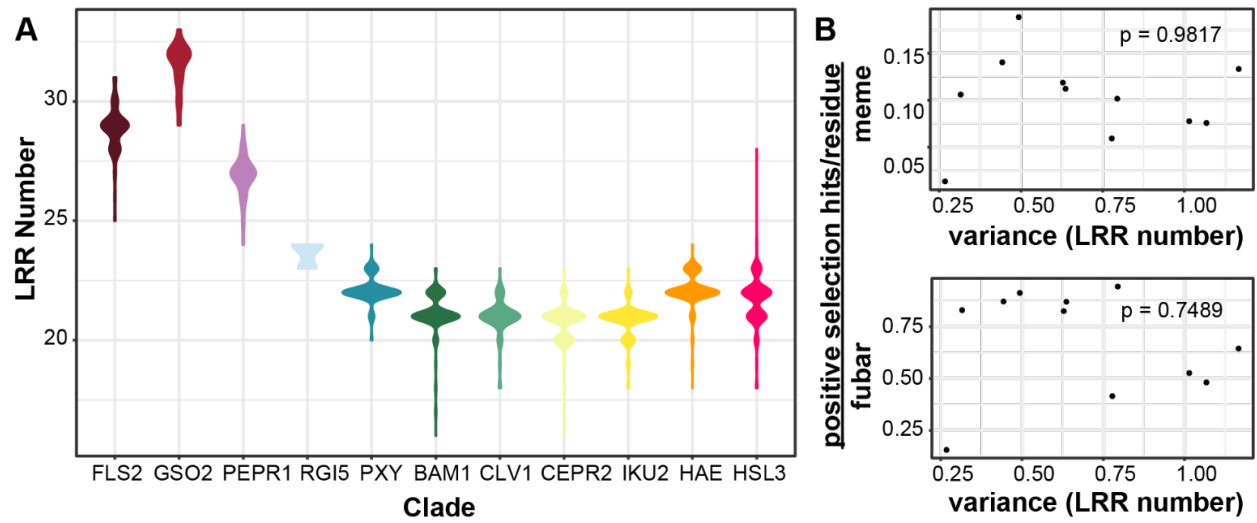

**FIG. S3. Variation in LRR number cannot account for variation in positive selection.** (A) LRR motif counts per clade. (B) The number of positive selection hits per LRR domain residue is not related to variance in LRR number per clade (p-values from Pearson correlation test).

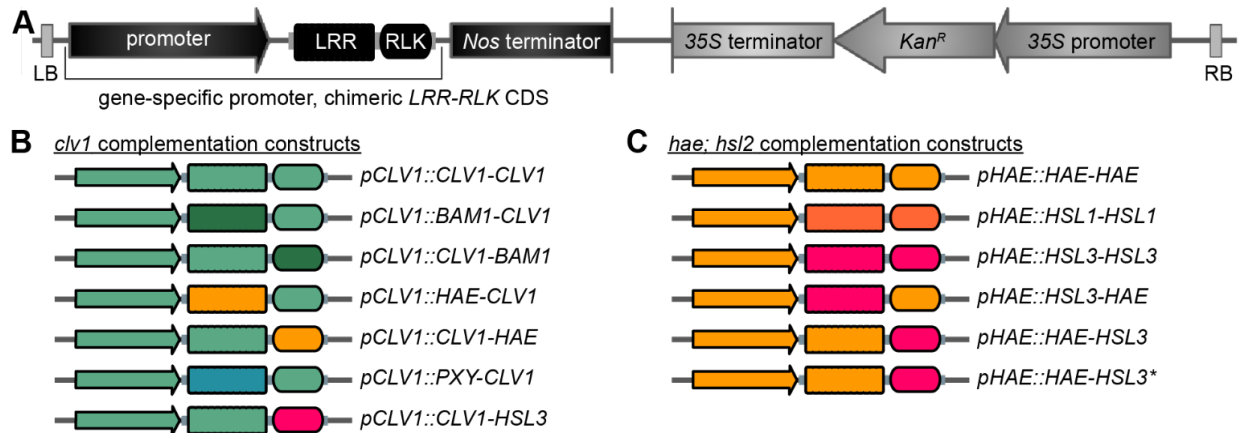

**FIG. S4. Complementation constructs.** (A) generalized T-DNA structure for all constructs. (B) Promoter and CDS sequences used in *clv1* complementation experiments. (C) Promoter and CDS sequences used in *hae; hsl2* complementation experiments. *HSL3\** = coding sequence for enzyme-dead HSL3. UTRs derived from cognate *LRR*- or *RLK*-encoding genes in all cases.

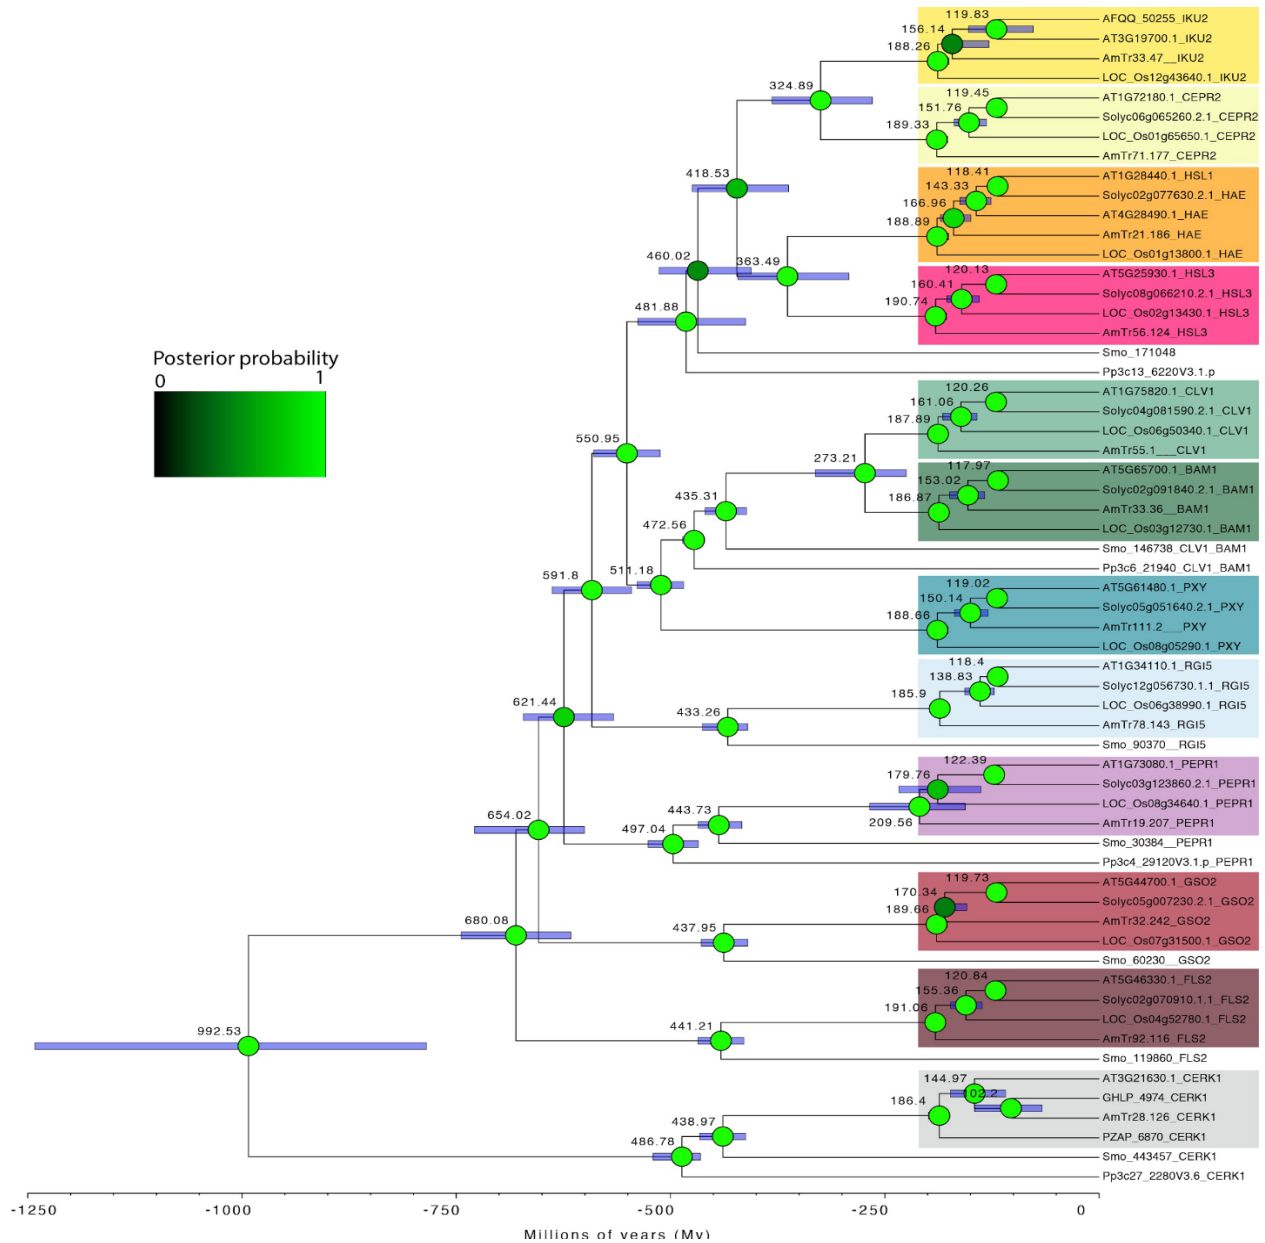

**FIG. S5. Chronogram for inference of gene clade divergence times and tree topology.** 4 angiosperm representatives from 11 LRR-RLK clades, and from *CERK1*, as well as well-supported representatives from *S. moellendorffii* and *P. patens* sister to those clades, were used to infer a time-calibrated gene divergence tree by Bayesian analysis. Blue bars over nodes represent 95% distribution probability range, while circles over nodes are colored according to posterior probability. Number next to each node is the estimated mean divergence time.

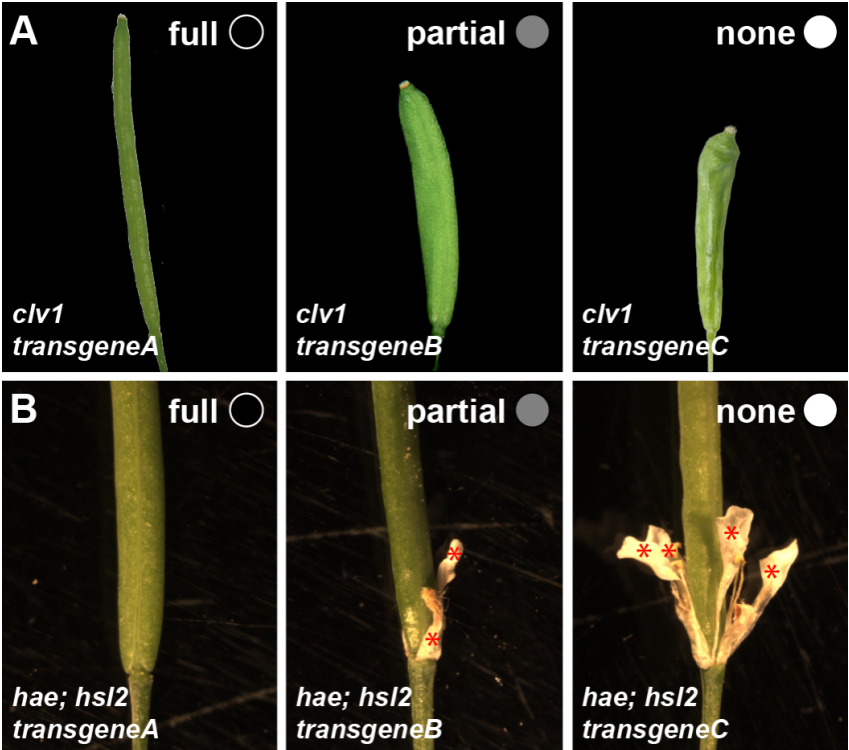

**FIG. S6. Representative siliques from full, partial, and no complementation of mutants. (A) *clv1* complementation (B) *hae; hsl2* complementation, \* = retained floral organ**

## Supplemental Tables

**Table S1.** Positive and negative selection acting on select proteins in the Papaveraceae

|                                       | <b>BAM1</b> | <b>CEPR2</b> | <b>HAE</b> | <b>CERK1</b> |
|---------------------------------------|-------------|--------------|------------|--------------|
| <b><u>MEME</u></b>                    |             |              |            |              |
| LRR residues under positive selection | 11          | 17           | 16         | 15           |
| RLK residues under positive selection | 4           | 6            | 4          | 3            |
| Chi <sup>2</sup> p-val                | 4.88E-01    | 3.24E-01     | 1.32E-01   | 2.03E-04     |
| <b><u>FUBAR</u></b>                   |             |              |            |              |
| LRR residues under negative selection | 383         | 263          | 337        | 49           |
| RLK residues under negative selection | 228         | 156          | 204        | 106          |
| Chi <sup>2</sup> p-val                | 2.76E-01    | 5.88E-01     | 4.59E-01   | 2.62E-02     |
